# Supplementary material
Source: Elsevier journal article supplement (https://www.sciencedirect.com/science/article/pii/S1699258X19301652)
Supplement: mmc1 [file S1699258X19301652:mmc1.docx]

**Anexo I: Índice de Gravedad del síndrome de Cushing (IGC)**

1. Distribución de la grasa
   - 0= normal
   - 1= obesidad central leve con/sin facies
   - 2= Obesidad central marcada con/sin facies
2. Lesiones cutáneas
   - 0= ausente
   - 1= manifestaciones leves de una o más de las siguientes: estrías y/o equimosis y/o infecciones
   - 2= manifestaciones graves de una o más de las siguientes: estrías y/o equimosis y/o infecciones.
3. Debilidad muscular
   - 0= ausente
   - 1= leve (sin incapacidad funcional)
   - 2= Grave (con incapacidad funcional)
4. Trastornos de conducta
   - 0= ausente
   - 1= leves (cambios de conducta menores que no requieren apoyo psiquiátrico)
   - 2= graves (trastornos de conducta mayores que afectan substancialmente los niveles individuales de funcionamiento y requieren ayuda psiquiátrica)
5. Hipertensión1
   - 0= ausente (presión sanguínea diastólica ≤ 90 mmHg)
   - 1= Leve (presión sanguínea diastólica >90 mmHg y ≤ 105 mmHg)
   - 2= grave (presión sanguínea diastólica >105 mmHg)
6. Diabetes2
   - 0= ausente (puede existir tolerancia a la glucosa disminuida)
   - 1= leve (glucosa sérica < 11 mmol/l)
   - 2= grave (glucosa sérica ≥ 11 mmol/l)
7. Hipokalemia3
   - 0= ausente (K sérico > 3.4 mmol/l)
   - 1= leve (K sérico 3.4-3.2 mmol/l)
   - 2= grave (K sérico < 3.2 mmol/l)
8. Alteraciones relacionadas al género
   1. Mujeres
   - 0= ausente
   - 1= manifestaciones leves de una o más de las siguientes: hirsutismo y/o pérdida de pelo; anormalidades menstruales.
   - 2= manifestaciones graves de una o más de las siguientes: hirsutismo y/o pérdida de pelo; amenorrea.
   1. Hombres
   - 0= ausente
   - 1= disminución de la libido, impotencia ocasional
   - 2= impotencia

1 La determinación de la presión sanguínea se refiere a la mediana de valores sin uso de tratamiento antihipertensivo.

2 Los niveles de glucosa se refieren a la mediana de valores sin uso de tratamiento específico.

3 Los niveles de potasio se refieren a la mediana de valores sin tratamiento específico.

**Anexo II: Índice de Gravedad del síndrome de Cushing (CSI) modificado**

1. Distribución de la grasa (Si hay facies de luna llena aumentar un punto en las dos primeras categorías)
   - 0= normal (ICC: <0.95 hombres o < 0.85 mujeres)
   - 1= obesidad central leve (ICC: 0.95 a 1.0 en hombres o 0.85 a 0.90 en mujeres)
   - 2= Obesidad central marcada (ICC: > 1.0 en hombres o > a 0.95 en mujeres)
2. Lesiones cutáneas
   - 0= ausente
   - 1= manifestaciones leves de una o más de las siguientes: estrías y/o equimosis y/o infecciones (extensión de ≤ 18% de sc)
   - 2= manifestaciones graves de una o más de las siguientes: estrías y/o equimosis y/o infecciones. (> 18 % de sc)
3. Debilidad muscular
   - 0= ausente (fuerza muscular grado 5)
   - 1= leve/moderada (sin incapacidad funcional) (fuerza muscular grado 3 a 4)
   - 2= Grave (con incapacidad funcional) (fuerza muscular grado 0 a 2)
4. Trastornos de conducta
   - 0= ausente
   - 1= leves (cambios de conducta menores que no requieren apoyo psiquiátrico)
   - 2= graves (trastornos de conducta mayores que afectan substancialmente los niveles individuales de funcionamiento y requieren ayuda psiquiátrica)
5. Hipertensión1
   - 0= ausente (presión sanguínea diastólica ≤ 90 mmHg)
   - 1= Leve/moderada (presión sanguínea diastólica >90 mmHg y ≤ 105 mmHg)
   - 2= grave (presión sanguínea diastólica >105 mmHg)
6. Diabetes2
   - 0= ausente (puede existir tolerancia a la glucosa disminuida)
   - 1= leve/moderada (glucosa sérica < 11 mmol/l o 198 mg/dl)
   - 2= grave (glucosa sérica ≥ 11 mmol/l o 198 mg/dl)
7. Hipokalemia3
   - 0= ausente (K sérico > 3.4 mmol/l)
   - 1= leve (K sérico 3.4-3.2 mmol/l)
   - 2= grave (K sérico < 3.2 mmol/l)
8. Alteraciones relacionadas al género

A Mujeres

- 0= ausente
- 1= manifestaciones leves de una o más de las siguientes: hirsutismo y/o pérdida de pelo; anormalidades menstruales.
- 2= manifestaciones graves de una o más de las siguientes: hirsutismo y/o pérdida de pelo; amenorrea.

B Hombres

- 0= ausente
- 1= disminución de la libido, impotencia ocasional
- 2= impotencia

ICC: índice cintura-cadera. La extensión de las lesiones cutáneas se mide con la regla de los nueves que se emplea en quemaduras.

1 La determinación de la presión sanguínea se refiere a la mediana de valores sin uso de tratamiento antihipertensivo.

2 Los niveles de glucosa se refieren a la mediana de valores sin uso de tratamiento específico.

3 Los niveles de potasio se refieren a la mediana de valores sin tratamiento específico.

| Ítems IGC (CSI) | Alfa de Cronbach si se elimina el elemento  Observador 1 | Alfa de Cronbach si se elimina el elemento  Observador 2 |
| --- | --- | --- |
| Distribución de la grasa | 0.312 | 0.297 |
| Lesiones cutáneas | 0.439 | 0.292 |
| Debilidad Muscular | 0.504 | **0.481** |
| Trastornos del estado de ánimo | 0.456 | **0.491** |
| Hipertensión | **0.583** | **0.479** |
| Diabetes | 0.402 | 0.337 |
| Hipocalemia | **0.550** | **0.459** |
| Alteraciones relacionadas al género | **0.608** | **0.499** |
| Alfa de Cronbach Total | 0.531 | 0.424 |
